# Supplementary material for: Prenatal Remote Monitoring of Women With Gestational Hypertensive Diseases: Cost Analysis
Source: PubMed Central journal article supplement (PMC5891672; doi:10.2196/jmir.9552), 2018-03-26
Supplement: jmir_v20i3e102_app1.pdf [file jmir_v20i3e102_app1.pdf]

**Supplementary file 1:** A detailed overview of the included costs

**1. Prenatal follow-up**

- Cardiotocographics
- Prenatal visits
- Ultrasounds

## 2. Prenatal admission to the hospital

Costs related to the labs of the mother:

- Activated partial thromboplastin time
- Aerobic culture of sanies
- Counting of erythrocytes and/or hematocrit
- Counting of the leukocytes
- Counting of the thrombocytes
- Dosing of albumin in micro-amount by an immunological method
- Dosing of albumin
- Dosing of aspartate aminotransferase and alanine aminotransferase
- Dosing of calcium
- Dosing of chloride
- Dosing of creatinine
- Dosing of CRP with an immunological method
- Dosing of fibrinogen
- Dosing of glucose
- Dosing of glucose or other reducing sugars
- Dosing of hemoglobin by electrometric method
- Dosing of lactic dehydrogenases
- Dosing of magnesium
- Dosing of phosphates
- Dosing of potassium
- Dosing of sodium
- Dosing of total bilirubin and its fractions
- Dosing of total protein
- Dosing of total proteins
- Dosing of urea
- Dosing of uric acid
- Microscopic examination of urine sediment, after double staining
- Thromboplastin time

Costs of the medications:

- Pharmaceutical costs:
  - o Aldomet® 250 mg
  - o Amlor® 5 mg
  - o Amlor® 10 mg
  - o Atropine sulfate aguettant injection 0.5 mg/ml
  - o Boostrix Polio® vaccine 0.5 ml
  - o Bridion® injection 2 ml/100 mg
  - o Buscopan® injection 1ml/20mg
  - o Cabergoline Teva® 0.5 mg
  - o Cedium Chlorhexidini® 0.0%
  - o Cedium Chlorhexidini® 0.5%
  - o Cafazoline Mylan® injection 2g
  - o Celestone® injection 4 mg/ml
  - o Chloramphenicol® 5 mg/ml
  - o Clexane® SC injection 0.4 mg
  - o Clexane® SC injection 0.6 mg

- o Clindamycine Fresenius Kabi® 150 mg/ml
- o Contramal® injection 100 mg/ml
- o Cytotec® 200 mcg
- o Dafalgan® 500 mg
- o Daktarin® Spray 100g
- o Diclofenac® suppo 100 mg
- o Diprivan® injection 200 mg/20ml
- o Edium Chlorhexidini® 0.05%
- o Ephedrine® injection 50 mg/1ml
- o Esmeron® injection 5 ml/50mg
- o Fentanyl® injection 2 ml
- o Fortal® 50 mg
- o Glucose injection 10 ml
- o Glucose 5% infusion 100 ml
- o Glucose 5% infusion 500 ml
- o Glucose 5% infusion 1000 ml
- o Hacidil - S® dilution 15 ml
- o Hirudoid® gel
- o Injectafer® 100mg/2ml
- o Instillagel®
- o Iso-Betadine® derm. 125 ml
- o Iso-Betadine® gyn. 500 ml
- o Iso-Betadine® hdryo-alkohol 500 ml
- o Iso-Betadine® unigyn. 500 ml
- o Linisol® 1% injection 10 ml
- o Linisol® 2% injection 10 ml
- o Litican® injection 50 mg/2ml
- o Magnesium sulphate 1g/10ml
- o Marcaine® injection 0.5%
- o Movical Neutral®
- o NaCl 0.9% 20 ml
- o NaCl 0.9% perfusion Viaflo
- o NaCl 0.9% perfusion 100 ml
- o NaCl 0.9% perfusion 250 ml
- o NaCl 0.9% perfusion 500 ml
- o NaCl 0.9% perfusion 1000 ml
- o Naropin® injection 20 ml 10mg/ml
- o Neobacitracine® Pro instant
- o Nepresol® 25 mg
- o Norgalax® 120 mg
- o Ondansetron Mylan® injection 2 mg
- o Otrivine anti - rhinitis®
- o Pabal® injection 1 ml/100mcg
- o Paracetamol Actavis® perfusion 500 mg
- o Paracetamol Fresenius Kabi® perfusion 10 mg/ml
- o Paraffine 10 ml
- o Penicilline 2.000.000E perfusion
- o Phenylephrine® injection 50 mcg/1 ml
- o Plasmalyte® 148 + Glucose 5%
- o Plasmalyte® a viaflo 1000 ml

- o Prepidil gel® 0.5 mg/3 ml
  - o Primperan® injection 10 mg/2 ml
  - o Prostin E2 comprime 0.5 mg
  - o Reparil® 1% gel
  - o Rhogam® injection 300 mcg
  - o Riopan® gel 10 ml
  - o Robinul + Neostigmine® injection 0.5 mg/ml
  - o Ropivacaine Fresenius Kabi® injection 7.5 mg/ml
  - o Scandicaïne® injection 1% 20 ml
  - o Sufenta® injection 0.01 mg
  - o Sufenta® injection 0.05 mg
  - o Syntocinon® injection 10E/2 ml
  - o Taradyl® injection 10 mg
  - o Tardyferon® 80 mg
  - o Trandate® 100 mg
  - o Ultiva® injection 5 mg
  - o Ultraproct® ointment 30 g
  - o Vaseline® ointment 20g
  - o Volulyte® 6% perfusion 500 ml
  - o Xylocaine® + Adrenaline 10mg/ml + 5ug/ml
  - o Zantac® 150 mg
- Patients costs for pharmaceutical products

#### Costs related to the admission:

- Cardiotocographics before the delivery
- Hospital care per admission
- Hospital care per day
- Medical imaging radiology
- Patients costs for clinical biology per day
- Personal share
- Supplement single room
- X-ray diagnosis

### 3. Maternal and neonatal care at and after delivery

Costs of the delivery:

- Additional fee for benefits with relative value
- Anesthesia
- Anesthesia for obstetric benefits
- Assistance provided by a physician in a hospital environment
- Delivery by cesarean section
- Delivery done by the midwife
- Monitoring and registration of fetal heart rate
- Normal or complicated delivery

Costs necessary for the care of the neonate:

- Activated partial thromboplastin time
- Aerobic culture of sanies
- Aortic puncture for decrease (s), injections, catheter insertion, etc.
- Biodimensional ultrasound
- Clinical examination of the newborn on the maternity
- Complicated dermatological correlation for extensive lesions, during hospitalization
- Counting of erythrocytes and/or hematocrit
- Counting of the leukocytes
- Counting of the thrombocytes
- Delivery margin of implants
- Determine anti-erythrocytes antibodies
- Determine blood groups
- Determine RH phenotype
- Dosing of albumin in micro-amount by an immunological method
- Dosing of ionized calcium outside each calculation method
- Dosing of sodium, potassium, chlorides and bicarbonates in plasma or serum
- Dosing of albumin
- Dosing of aspartate aminotransferase and alanine aminotransferase
- Dosing of calcium
- Dosing of chloride
- Dosing of creatinine
- Dosing of CRP with an immunological method
- Dosing of fibrinogen
- Dosing of glucose
- Dosing of glucose or other reducing sugars
- Dosing of hemoglobin by electrometric method
- Dosing of lactic dehydrogenases
- Dosing of magnesium
- Dosing of phosphates
- Dosing of potassium
- Dosing of sodium
- Dosing of total bilirubin and its fractions
- Dosing of total protein
- Dosing of total proteins
- Dosing of urea
- Dosing of uric acid
- Full blood and labile blood products - Fresh frozen human plasma virus inactivated

- Full transthoracic echographic bilan of the heart
- Hemoculture with identification of the isolated germs
- Hospital care per admission to the neonatal intensive care
- Hospital care per day at the neonatal intensive care
- Individual kinesiotherapy session where the personal involvement of the physiotherapist per beneficiary has a global average duration of 15 minutes
- Installation and monitoring of positive pressure ventilation by nasal route using probe or mask and artificial respiratory equipment
- Installation and supervision of controlled or assisted continuous ventilation
- Installation and supervision on the continues monitoring of the heart function of the neonate older than 33 weeks
- Intravenous perfusion to child younger than seven years old
- Larynx intubation
- Medical imaging radiology
- Microscopic examination of urine sediment, after double staining
- Patients costs for clinical biology per day
- Patients costs for the admission to the intensive care
- Peripherally inserted central venous catheter (PICC) for long-term use
- Personal share for the admission to the neonatal intensive care
- pH determination and CO<sub>2</sub>- and O<sub>2</sub> pressures in the blood (acid base equilibrium)
- Placement of an umbilical catheter in the newborn outside the anesthesia
- Stomach catheterization in children less than seven years
- Surveillance from day 6 until day 12 after the delivery on the maternity
- Take charge of newborns by at risk pregnancies
- Thromboplastin time
- Total abdominal investigation with at least eight incisions
- X-ray diagnosis

Other costs:

- Admission to the emergency room
- Admission to the intensive care
- Blood derives
- Patients costs for the admission to the intensive care
