# Supplementary material for: Prenatal Remote Monitoring of Women With Gestational Hypertensive Diseases: Cost Analysis
Source: PubMed Central journal article supplement (PMC5891672; doi:10.2196/jmir.9552), 2018-03-26
Supplement: jmir_v20i3e102_app2.pdf [file jmir_v20i3e102_app2.pdf]

**Supplementary file 2: Multivariable model for the prediction of healthcare costs using maternal demographics and characteristics**

| Variable                                             | Beta  | 95.0% CI for B |             | P-value |
|------------------------------------------------------|-------|----------------|-------------|---------|
|                                                      |       | Lower Bound    | Upper Bound |         |
| <b>Outcome 1: HCS costs of prenatal visits</b>       |       |                |             |         |
| RM vs. no RM                                         | -1.20 | -42.65         | 13.59       | 0.31    |
| Maternal age, 1 year increase                        | -0.02 | -3.05          | 2.43        | 0.82    |
| Pre-pregnancy weight, 1 kg increase                  | -0.35 | -5.38          | 2.84        | 0.54    |
| Height, 1 cm increase                                | 0.21  | -2.33          | 6.46        | 0.35    |
| BMI, 1 kg/m <sup>2</sup> increase                    | 0.33  | -7.93          | 14.96       | 0.54    |
| Primigravida vs. multigravida                        | -0.14 | -46.77         | 7.78        | 0.16    |
| Smoking vs. no smoking                               | -0.00 | -60.12         | 59.04       | 0.99    |
| <b>Outcome 2: RIZIV costs of prenatal visits</b>     |       |                |             |         |
| RM vs. no RM                                         | -1.20 | -25.59         | 8.16        | 0.31    |
| Maternal age, 1 year increase                        | -0.02 | -1.83          | 1.46        | 0.82    |
| Pre-pregnancy weight, 1 kg increase                  | -0.35 | -3.23          | 1.71        | 0.54    |
| Height, 1 cm increase                                | 0.21  | -1.40          | 3.88        | 0.35    |
| BMI, 1 kg/m <sup>2</sup> increase                    | 0.33  | -4.76          | 8.98        | 0.54    |
| Primigravida vs. multigravida                        | -0.14 | -28.07         | 4.67        | 0.16    |
| Smoking vs. no smoking                               | -0.00 | -36.08         | 35.43       | 0.99    |
| <b>Outcome 3: patients costs for prenatal visits</b> |       |                |             |         |
| RM vs. no RM                                         | -1.20 | -18.05         | 5.43        | 0.31    |
| Maternal age, 1 year increase                        | -0.02 | -1.22          | 0.97        | 0.82    |
| Pre-pregnancy weight, 1 kg increase                  | -0.35 | -2.15          | 1.14        | 0.54    |
| Height, 1 cm increase                                | 0.21  | -0.93          | 2.58        | 0.35    |
| BMI, 1 kg/m <sup>2</sup> increase                    | 0.33  | -3.17          | 5.98        | 0.54    |
| Primigravida vs. multigravida                        | -0.14 | -18.70         | 3.11        | 0.16    |
| Smoking vs. no smoking                               | -0.00 | -24.04         | 23.61       | 0.99    |
| <b>Outcome 4: HCS costs for ultrasounds</b>          |       |                |             |         |
| RM vs. no RM                                         | -0.07 | -31.59         | 15.02       | 0.48    |
| Maternal age, 1 year increase                        | 0.11  | -0.99          | 3.55        | 0.27    |
| Pre-pregnancy weight, 1 kg increase                  | -0.48 | -4.86          | 1.96        | 0.40    |
| Height, 1 cm increase                                | 0.20  | -1.98          | 5.30        | 0.37    |
| BMI, 1 kg/m <sup>2</sup> increase                    | 0.40  | -5.86          | 13.10       | 0.45    |
| Primigravida vs. multigravida                        | -0.00 | -22.74         | 22.47       | 0.99    |
| Smoking vs. no smoking                               | 0.06  | -34.46         | 64.30       | 0.55    |
| <b>Outcome 5: RIZIV costs for ultrasounds</b>        |       |                |             |         |
| RM vs. no RM                                         | -0.07 | -28.65         | 13.62       | 0.48    |
| Maternal age, 1 year increase                        | 0.11  | -0.90          | 3.22        | 0.27    |
| Pre-pregnancy weight, 1 kg increase                  | -0.48 | -4.41          | 1.77        | 0.40    |
| Height, 1 cm increase                                | 0.20  | -1.80          | 4.80        | 0.37    |
| BMI, 1 kg/m <sup>2</sup> increase                    | 0.40  | -5.33          | 11.87       | 0.45    |
| Primigravida vs. multigravida                        | -0.00 | -20.62         | 20.38       | 0.99    |
| Smoking vs. no smoking                               | 0.06  | -31.25         | 58.30       | 0.55    |
| <b>Outcome 6: patients costs for ultrasounds</b>     |       |                |             |         |
| RM vs. no RM                                         | -0.07 | -2.95          | 1.40        | 0.48    |
| Maternal age, 1 year increase                        | 0.11  | -0.09          | 0.33        | 0.27    |
| Pre-pregnancy weight, 1 kg increase                  | -0.48 | -0.45          | 0.18        | 0.40    |
| Height, 1 cm increase                                | 0.20  | -0.19          | 0.50        | 0.37    |
| BMI, 1 kg/m <sup>2</sup> increase                    | 0.40  | -0.55          | 1.22        | 0.45    |
| Primigravida vs. multigravida                        | -0.00 | -2.12          | 2.10        | 0.99    |
| Smoking vs. no smoking                               | 0.06  | -3.21          | 6.00        | 0.55    |
| <b>Outcome 7: HCS costs for cardiotocographics</b>   |       |                |             |         |
| RM vs. no RM                                         | 0.12  | -17.53         | 76.34       | 0.22    |
| Maternal age, 1 year increase                        | -0.02 | -5.12          | 4.02        | 0.81    |
| Pre-pregnancy weight, 1 kg increase                  | 0.15  | -5.96          | 7.76        | 0.80    |

|                                                         |       |         |        |             |
|---------------------------------------------------------|-------|---------|--------|-------------|
| Height, 1 cm increase                                   | -0.04 | -8.02   | 6.65   | 0.85        |
| BMI, 1 kg/m <sup>2</sup> increase                       | -0.03 | -19.71  | 18.50  | 0.95        |
| Primigravida vs. multigravida                           | -0.12 | -74.24  | 16.83  | 0.21        |
| Smoking vs. no smoking                                  | 0.02  | -88.27  | 110.63 | 0.82        |
| <b>Outcome 8: RIZIV costs for cardiotocographics</b>    |       |         |        |             |
| RM vs. no RM                                            | 0.12  | -8.77   | 38.17  | 0.22        |
| Maternal age, 1 year increase                           | -0.02 | -2.56   | 2.01   | 0.81        |
| Pre-pregnancy weight, 1 kg increase                     | 0.15  | -2.98   | 3.88   | 0.80        |
| Height, 1 cm increase                                   | -0.04 | -4.01   | 3.33   | 0.85        |
| BMI, 1 kg/m <sup>2</sup> increase                       | -0.03 | -9.85   | 9.25   | 0.95        |
| Primigravida vs. multigravida                           | -0.12 | -37.12  | 8.42   | 0.21        |
| Smoking vs. no smoking                                  | 0.02  | -44.13  | 55.31  | 0.82        |
| <b>Outcome 9: patients costs for cardiotocographics</b> |       |         |        |             |
| RM vs. no RM                                            | 0.12  | -8.77   | 38.17  | 0.22        |
| Maternal age, 1 year increase                           | -0.02 | -2.56   | 2.01   | 0.81        |
| Pre-pregnancy weight, 1 kg increase                     | 0.15  | -2.98   | 3.88   | 0.80        |
| Height, 1 cm increase                                   | -0.04 | -4.01   | 3.33   | 0.85        |
| BMI, 1 kg/m <sup>2</sup> increase                       | -0.03 | -9.85   | 9.25   | 0.95        |
| Primigravida vs. multigravida                           | -0.12 | -37.12  | 8.42   | 0.21        |
| Smoking vs. no smoking                                  | 0.02  | -44.13  | 55.32  | 0.82        |
| <b>Outcome 10: HCS costs for labs</b>                   |       |         |        |             |
| RM vs. no RM                                            | -0.07 | -28.08  | 12.79  | 0.46        |
| Maternal age, 1 year increase                           | -0.07 | -2.71   | 1.26   | 0.47        |
| Pre-pregnancy weight, 1 kg increase                     | 0.22  | -2.44   | 3.53   | 0.72        |
| Height, 1 cm increase                                   | -0.06 | -3.65   | 2.74   | 0.78        |
| BMI, 1 kg/m <sup>2</sup> increase                       | -0.09 | -9.05   | 7.59   | 0.86        |
| Primigravida vs. multigravida                           | 0.15  | -4.19   | 35.46  | 0.12        |
| Smoking vs. no smoking                                  | 0.03  | -37.08  | 49.51  | 0.78        |
| <b>Outcome 11: RIZIV costs for labs</b>                 |       |         |        |             |
| RM vs. no RM                                            | -0.07 | -28.07  | 8.67   | 0.30        |
| Maternal age, 1 year increase                           | -0.07 | -2.49   | 1.08   | 0.44        |
| Pre-pregnancy weight, 1 kg increase                     | 0.22  | -2.15   | 3.22   | 0.69        |
| Height, 1 cm increase                                   | -0.07 | -3.34   | 2.40   | 0.75        |
| BMI, 1 kg/m <sup>2</sup> increase                       | -0.11 | -8.30   | 6.65   | 0.83        |
| Primigravida vs. multigravida                           | 0.19  | -0.20   | 35.45  | 0.05        |
| Smoking vs. no smoking                                  | -0.01 | -40.89  | 36.95  | 0.92        |
| <b>Outcome 12: patients costs for labs</b>              |       |         |        |             |
| RM vs. no RM                                            | 0.09  | -2.59   | 6.70   | 0.38        |
| Maternal age, 1 year increase                           | -0.01 | -0.47   | 0.43   | 0.93        |
| Pre-pregnancy weight, 1 kg increase                     | 0.01  | -0.67   | 0.69   | 0.98        |
| Height, 1 cm increase                                   | 0.01  | -0.70   | 0.74   | 0.96        |
| BMI, 1 kg/m <sup>2</sup> increase                       | 0.05  | -1.80   | 1.98   | 0.92        |
| Primigravida vs. multigravida                           | -0.09 | -6.49   | 2.51   | 0.38        |
| Smoking vs. no smoking                                  | 0.16  | -1.65   | 18.02  | 0.10        |
| <b>Outcome 13: HCS costs for prenatal admission</b>     |       |         |        |             |
| RM vs. no RM                                            | 0.13  | -113.21 | 567.20 | 0.19        |
| Maternal age, 1 year increase                           | 0.04  | -25.29  | 40.94  | 0.64        |
| Pre-pregnancy weight, 1 kg increase                     | 0.09  | -45.91  | 53.58  | 0.88        |
| Height, 1 cm increase                                   | -0.07 | -61.98  | 44.35  | 0.74        |
| BMI, 1 kg/m <sup>2</sup> increase                       | -0.11 | -153.52 | 123.40 | 0.83        |
| Primigravida vs. multigravida                           | 0.23  | 60.34   | 720.41 | <b>0.02</b> |
| Smoking vs. no smoking                                  | -0.01 | -749.96 | 691.68 | 0.94        |
| <b>Outcome 14: RIZIV costs for prenatal admission</b>   |       |         |        |             |
| RM vs. no RM                                            | 0.09  | -98.26  | 267.62 | 0.36        |
| Maternal age, 1 year increase                           | 0.03  | -15.35  | 20.26  | 0.79        |
| Pre-pregnancy weight, 1 kg increase                     | 0.20  | -22.10  | 31.40  | 0.73        |

|                                                          |       |         |        |              |
|----------------------------------------------------------|-------|---------|--------|--------------|
| Height, 1 cm increase                                    | -0.11 | -35.64  | 21.54  | 0.63         |
| BMI, 1 kg/m <sup>2</sup> increase                        | -0.18 | -87.10  | 61.81  | 0.74         |
| Primigravida vs. multigravida                            | 0.23  | 34.51   | 389.45 | <b>0.02</b>  |
| Smoking vs. no smoking                                   | -0.03 | -439.18 | 336.04 | 0.79         |
| <b>Outcome 15: patients costs for prenatal admission</b> |       |         |        |              |
| RM vs. no RM                                             | 0.16  | -35.59  | 320.22 | 0.12         |
| Maternal age, 1 year increase                            | 0.06  | -11.95  | 22.69  | 0.54         |
| Pre-pregnancy weight, 1 kg increase                      | -0.04 | -26.82  | 25.20  | 0.95         |
| Height, 1 cm increase                                    | -0.03 | -29.57  | 26.04  | 0.90         |
| BMI, 1 kg/m <sup>2</sup> increase                        | -0.04 | -74.82  | 69.99  | 0.95         |
| Primigravida vs. multigravida                            | 0.20  | 5.81    | 350.98 | <b>0.04</b>  |
| Smoking vs. no smoking                                   | 0.01  | -354.50 | 399.37 | 0.91         |
| <b>Outcome 16: HCS costs for medicaments</b>             |       |         |        |              |
| RM vs. no RM                                             | -0.01 | -42.48  | 39.23  | 0.94         |
| Maternal age, 1 year increase                            | -0.08 | -5.60   | 2.36   | 0.42         |
| Pre-pregnancy weight, 1 kg increase                      | 0.26  | -4.56   | 7.39   | 0.64         |
| Height, 1 cm increase                                    | -0.20 | -9.36   | 3.41   | 0.36         |
| BMI, 1 kg/m <sup>2</sup> increase                        | -0.23 | -20.37  | 12.88  | 0.66         |
| Primigravida vs. multigravida                            | 0.25  | 12.59   | 91.85  | <b>0.01</b>  |
| Smoking vs. no smoking                                   | 0.00  | -85.19  | 87.83  | 0.98         |
| <b>Outcome 17: RIZIV costs for medicaments</b>           |       |         |        |              |
| RM vs. no RM                                             | 0.03  | -20.55  | 26.87  | 0.79         |
| Maternal age, 1 year increase                            | -0.11 | -3.62   | 0.99   | 0.26         |
| Pre-pregnancy weight, 1 kg increase                      | 0.31  | -2.53   | 4.41   | 0.59         |
| Height, 1 cm increase                                    | -0.15 | -4.94   | 2.47   | 0.51         |
| BMI, 1 kg/m <sup>2</sup> increase                        | -0.24 | -11.82  | 7.48   | 0.66         |
| Primigravida vs. multigravida                            | 0.14  | -6.33   | 39.68  | 0.15         |
| Smoking vs. no smoking                                   | -0.02 | -54.05  | 46.43  | 0.88         |
| <b>Outcome 18: patients costs for medicaments</b>        |       |         |        |              |
| RM vs. no RM                                             | -0.07 | -34.64  | 16.25  | 0.48         |
| Maternal age, 1 year increase                            | -0.01 | -2.60   | 2.35   | 0.92         |
| Pre-pregnancy weight, 1 kg increase                      | 0.27  | -2.80   | 4.64   | 0.63         |
| Height, 1 cm increase                                    | -0.17 | -5.52   | 2.43   | 0.44         |
| BMI, 1 kg/m <sup>2</sup> increase                        | -0.31 | -13.51  | 7.20   | 0.55         |
| Primigravida vs. multigravida                            | 0.29  | 12.84   | 62.20  | <b>0.003</b> |
| Smoking vs. no smoking                                   | 0.01  | -50.05  | 57.76  | 0.89         |
| <b>Outcome 19: HCS costs for delivery</b>                |       |         |        |              |
| RM vs. no RM                                             | 0.05  | -146.18 | 240.89 | 0.63         |
| Maternal age, 1 year increase                            | 0.03  | -15.54  | 22.14  | 0.73         |
| Pre-pregnancy weight, 1 kg increase                      | 0.11  | -25.52  | 31.07  | 0.85         |
| Height, 1 cm increase                                    | -0.21 | -45.21  | 15.28  | 0.33         |
| BMI, 1 kg/m <sup>2</sup> increase                        | -0.28 | -100.44 | 57.10  | 0.59         |
| Primigravida vs. multigravida                            | 0.10  | -94.59  | 280.91 | 0.33         |
| Smoking vs. no smoking                                   | -0.03 | -476.50 | 343.61 | 0.75         |
| <b>Outcome 20: RIZIV costs for delivery</b>              |       |         |        |              |
| RM vs. no RM                                             | -0.03 | -88.19  | 63.87  | 0.75         |
| Maternal age, 1 year increase                            | 0.09  | -3.91   | 10.89  | 0.35         |
| Pre-pregnancy weight, 1 kg increase                      | 0.22  | -8.95   | 13.29  | 0.70         |
| Height, 1 cm increase                                    | -0.30 | -20.16  | 3.61   | 0.17         |
| BMI, 1 kg/m <sup>2</sup> increase                        | -0.26 | -38.70  | 23.19  | 0.62         |
| Primigravida vs. multigravida                            | 0.13  | -23.79  | 123.73 | 0.18         |
| Smoking vs. no smoking                                   | 0.08  | -95.02  | 227.17 | 0.42         |
| <b>Outcome 21: patients costs for delivery</b>           |       |         |        |              |
| RM vs. no RM                                             | 0.07  | -98.54  | 217.57 | 0.46         |
| Maternal age, 1 year increase                            | -0.00 | -15.57  | 15.20  | 0.98         |
| Pre-pregnancy weight, 1 kg increase                      | 0.03  | -22.51  | 23.71  | 0.96         |

|                                                        |       |          |         |      |
|--------------------------------------------------------|-------|----------|---------|------|
| Height, 1 cm increase                                  | -0.12 | -31.39   | 18.01   | 0.59 |
| BMI, 1 kg/m <sup>2</sup> increase                      | -0.22 | -78.24   | 50.41   | 0.70 |
| Primigravida vs. multigravida                          | 0.05  | -110.14  | 196.52  | 0.58 |
| Smoking vs. no smoking                                 | -0.07 | -467.40  | 202.36  | 0.43 |
| <b>Outcome 22: HCS costs for neonatal care</b>         |       |          |         |      |
| RM vs. no RM                                           | -0.08 | -2117.84 | 936.95  | 0.45 |
| Maternal age, 1 year increase                          | -0.01 | -158.39  | 138.95  | 0.90 |
| Pre-pregnancy weight, 1 kg increase                    | -0.33 | -287.56  | 159.07  | 0.57 |
| Height, 1 cm increase                                  | 0.01  | -232.67  | 244.74  | 0.96 |
| BMI, 1 kg/m <sup>2</sup> increase                      | 0.31  | -438.78  | 804.51  | 0.56 |
| Primigravida vs. multigravida                          | 0.11  | -690.95  | 2272.51 | 0.29 |
| Smoking vs. no smoking                                 | -0.03 | -3789.20 | 2683.23 | 0.74 |
| <b>Outcome 23: RIZIV costs for neonatal care</b>       |       |          |         |      |
| RM vs. no RM                                           | -0.07 | -1960.64 | 895.27  | 0.46 |
| Maternal age, 1 year increase                          | -0.01 | -145.37  | 132.60  | 0.93 |
| Pre-pregnancy weight, 1 kg increase                    | -0.35 | -272.74  | 144.82  | 0.55 |
| Height, 1 cm increase                                  | 0.01  | -216.34  | 229.99  | 0.95 |
| BMI, 1 kg/m <sup>2</sup> increase                      | 0.34  | -394.42  | 769.92  | 0.52 |
| Primigravida vs. multigravida                          | 0.11  | -637.58  | 2132.94 | 0.29 |
| Smoking vs. no smoking                                 | -0.03 | -3515.15 | 2535.86 | 0.75 |
| <b>Outcome 24: patients costs for neonatal care</b>    |       |          |         |      |
| RM vs. no RM                                           | -0.09 | -182.45  | 66.94   | 0.36 |
| Maternal age, 1 year increase                          | -0.05 | -15.47   | 8.80    | 0.59 |
| Pre-pregnancy weight, 1 kg increase                    | -0.02 | -18.52   | 17.95   | 0.98 |
| Height, 1 cm increase                                  | -0.02 | -20.28   | 18.70   | 0.94 |
| BMI, 1 kg/m <sup>2</sup> increase                      | -0.12 | -56.63   | 44.87   | 0.82 |
| Primigravida vs. multigravida                          | 0.07  | -77.86   | 164.07  | 0.48 |
| Smoking vs. no smoking                                 | -0.05 | -327.54  | 200.87  | 0.64 |
| <b>Outcome 25: HCS costs for other</b>                 |       |          |         |      |
| RM vs. no RM                                           | -0.14 | -95.75   | 17.13   | 0.17 |
| Maternal age, 1 year increase                          | -0.13 | -9.32    | 1.67    | 0.17 |
| Pre-pregnancy weight, 1 kg increase                    | -0.15 | -9.35    | 7.16    | 0.79 |
| Height, 1 cm increase                                  | 0.22  | -4.35    | 13.29   | 0.32 |
| BMI, 1 kg/m <sup>2</sup> increase                      | 0.10  | -20.72   | 25.22   | 0.85 |
| Primigravida vs. multigravida                          | 0.03  | -45.68   | 63.82   | 0.74 |
| Smoking vs. no smoking                                 | -0.09 | -174.62  | 64.53   | 0.36 |
| <b>Outcome 26: RIZIV costs for other</b>               |       |          |         |      |
| RM vs. no RM                                           | -0.14 | -96.04   | 17.21   | 0.17 |
| Maternal age, 1 year increase                          | -0.12 | -9.21    | 1.81    | 0.19 |
| Pre-pregnancy weight, 1 kg increase                    | -0.14 | -9.30    | 7.26    | 0.81 |
| Height, 1 cm increase                                  | 0.21  | -4.53    | 13.17   | 0.34 |
| BMI, 1 kg/m <sup>2</sup> increase                      | 0.09  | -21.00   | 25.10   | 0.86 |
| Primigravida vs. multigravida                          | 0.04  | -43.69   | 66.18   | 0.69 |
| Smoking vs. no smoking                                 | -0.09 | -174.48  | 65.47   | 0.37 |
| <b>Outcome 27: patients costs for other</b>            |       |          |         |      |
| RM vs. no RM                                           | 0.00  | -5.11    | 5.32    | 0.97 |
| Maternal age, 1 year increase                          | -0.05 | -0.63    | 0.38    | 0.63 |
| Pre-pregnancy weight, 1 kg increase                    | -0.11 | -0.84    | 0.39    | 0.85 |
| Height, 1 cm increase                                  | 0.09  | 0.70     | 0.97    | 0.70 |
| BMI, 1 kg/m <sup>2</sup> increase                      | 0.10  | 0.85     | 2.33    | 0.85 |
| Primigravida vs. multigravida                          | -0.09 | 0.40     | 2.89    | 0.40 |
| Smoking vs. no smoking                                 | -0.01 | 0.92     | 10.51   | 0.92 |
| <b>Outcome 28: HCS costs for total amount of costs</b> |       |          |         |      |
| RM vs. no RM                                           | -0.04 | -1951.04 | 1300.87 | 0.69 |
| Maternal age, 1 year increase                          | -0.01 | -162.26  | 154.27  | 0.96 |
| Pre-pregnancy weight, 1 kg increase                    | -0.28 | -296.41  | 179.05  | 0.63 |

|                                                             |       |          |         |      |
|-------------------------------------------------------------|-------|----------|---------|------|
| Height, 1 cm increase                                       | -0.02 | -268.21  | 240.00  | 0.91 |
| BMI, 1 kg/m <sup>2</sup> increase                           | 0.24  | -512.57  | 810.84  | 0.66 |
| Primigravida vs. multigravida                               | 0.16  | -290.22  | 2864.47 | 0.11 |
| Smoking vs. no smoking                                      | -0.04 | -4117.46 | 2771.61 | 0.70 |
| <b>Outcome 29: RIZIV costs for total amount of costs</b>    |       |          |         |      |
| RM vs. no RM                                                | -0.07 | -2010.89 | 976.01  | 0.49 |
| Maternal age, 1 year increase                               | -0.01 | -152.65  | 138.08  | 0.92 |
| Pre-pregnancy weight, 1 kg increase                         | -0.31 | -278.14  | 158.57  | 0.59 |
| Height, 1 cm increase                                       | -0.00 | -235.19  | 231.61  | 0.99 |
| BMI, 1 kg/m <sup>2</sup> increase                           | -0.31 | -431.23  | 784.42  | 0.57 |
| Primigravida vs. multigravida                               | 0.14  | -417.26  | 2480.34 | 0.16 |
| Smoking vs. no smoking                                      | -0.03 | -3680.48 | 2648.09 | 0.75 |
| <b>Outcome 30: patients costs for total amount of costs</b> |       |          |         |      |
| RM vs. no RM                                                | 0.09  | -161.81  | 458.05  | 0.35 |
| Maternal age, 1 year increase                               | 0.01  | -29.29   | 31.04   | 0.95 |
| Pre-pregnancy weight, 1 kg increase                         | 0.01  | -44.83   | 45.80   | 0.98 |
| Height, 1 cm increase                                       | -0.10 | -59.26   | 37.61   | 0.66 |
| BMI, 1 kg/m <sup>2</sup> increase                           | -0.19 | -149.13  | 103.16  | 0.72 |
| Primigravida vs. multigravida                               | 0.18  | -19.94   | 581.39  | 0.07 |
| Smoking vs. no smoking                                      | -0.05 | -816.55  | 496.81  | 0.63 |
| CI = Confidence interval, RM = remote monitoring            |       |          |         |      |
