# Supplementary material for: Prenatal Remote Monitoring of Women With Gestational Hypertensive Diseases: Cost Analysis
Source: PubMed Central journal article supplement (PMC5891672; doi:10.2196/jmir.9552), 2018-03-26
Supplement: jmir_v20i3e102_app3.pdf [file jmir_v20i3e102_app3.pdf]

| <b>Supplementary file 3: Healthcare costs</b>                                                                                                                                                                                                         |        |                             |                             |                                    |       |                                              |
|-------------------------------------------------------------------------------------------------------------------------------------------------------------------------------------------------------------------------------------------------------|--------|-----------------------------|-----------------------------|------------------------------------|-------|----------------------------------------------|
|                                                                                                                                                                                                                                                       |        | <b>Study group</b>          |                             | <b>Cost saving in the RM group</b> |       | <b>Statistical significance (2 - tailed)</b> |
|                                                                                                                                                                                                                                                       |        | <i>RM group (n = 43)</i>    | <i>CC group (n = 97)</i>    | €                                  | %     |                                              |
| <b>Total amount of costs</b>                                                                                                                                                                                                                          |        |                             |                             |                                    |       |                                              |
| - HCS costs (€)                                                                                                                                                                                                                                       | Mean   | 4233.31 (± 3463.31)         | 4973.69 (± 5219.00)         | 740.38                             | 14.89 | 0.82                                         |
|                                                                                                                                                                                                                                                       | Median | 3317.97 (2832.16 - 3910.34) | 3287.98 (2708.22 - 4542.21) |                                    |       |                                              |
| - RIZIV costs (€)                                                                                                                                                                                                                                     | Mean   | 2797.42 (± 2905.18)         | 3646.39 (± 4878.47)         | 848.97                             | 23.18 | 0.19                                         |
|                                                                                                                                                                                                                                                       | Median | 1904.68 (1747.65 - 2399.10) | 2304.52 (1729.86 - 2872.81) |                                    |       |                                              |
| - Patients costs (€)                                                                                                                                                                                                                                  | Mean   | 1435.89 (± 829.09)          | 1327.30 (± 753.94)          | -108.59                            | -8.18 | 0.38                                         |
|                                                                                                                                                                                                                                                       | Median | 1332.95 (857.32 - 1750.41)  | 1270.58 (648.33 - 1738.51)  |                                    |       |                                              |
| Values are means ± SD and median with inter-quartile in euros (€); costs savings are calculated in euros (€) and percentages (%).<br>RM = remote monitoring; CC = conventional care; HCS = health care system; RIZIV = national healthcare insurances |        |                             |                             |                                    |       |                                              |
