# Supplementary material for: Prenatal Remote Monitoring of Women With Gestational Hypertensive Diseases: Cost Analysis
Source: PubMed Central journal article supplement (PMC5891672; doi:10.2196/jmir.9552), 2018-03-26
Supplement: jmir_v20i3e102_app4.pdf [file jmir_v20i3e102_app4.pdf]

**Supplementary file 4:** detailed information the mean time of prenatal RM follow-up/pregnant woman.

|               | <i>Minimum</i> | <i>Maximum</i> | <i>Mean</i> | <i>STD</i> |
|---------------|----------------|----------------|-------------|------------|
| Days RM (d)   | 1              | 145            | 44.42       | 41.01      |
| Months RM (m) | 0.03           | 4.80           | 1.41        | 1.34       |

RM = Remote Monitoring

|                                   |        | <b>Study group</b>          |                             | <b>Cost saving in the RM group</b> |       | <b>Statistical significance (2 - tailed)</b> |
|-----------------------------------|--------|-----------------------------|-----------------------------|------------------------------------|-------|----------------------------------------------|
|                                   |        | <i>RM group (n = 43)</i>    | <i>CC group (n = 97)</i>    | €                                  | %     |                                              |
| <b>Total amount of costs</b>      |        |                             |                             |                                    |       |                                              |
| - HCS costs (€)                   | Mean   | 4233.31 (± 3463.31)         | 4973.69 (± 5219.00)         | 740.38                             | 14.89 | 0.82                                         |
|                                   | Median | 3317.97 (2832.16 - 3910.34) | 3287.98 (2708.22 - 4542.21) |                                    |       |                                              |
| - RIZIV costs (€)                 | Mean   | 2797.42 (± 2905.18)         | 3646.39 (± 4878.47)         | 848.97                             | 23.18 | 0.19                                         |
|                                   | Median | 1904.68 (1747.65 - 2399.10) | 2304.52 (1729.86 - 2872.81) |                                    |       |                                              |
| - Patients costs (€)              | Mean   | 1435.89 (± 829.09)          | 1327.30 (± 753.94)          | -108.59                            | -8.18 | 0.38                                         |
|                                   | Median | 1332.95 (857.32 - 1750.41)  | 1270.58 (648.33 - 1738.51)  |                                    |       |                                              |
| <b>Total amount of costs + RM</b> |        |                             |                             |                                    |       |                                              |
| - HCS costs (€)                   | Mean   | 4971.58 (± 3479.81)         | 4973.69 (± 5219.00)         | 2.11                               | 0.04  | <b>0.01</b>                                  |
|                                   | Median | 4971.58 (3390.04 - 4617.90) | 3287.98 (2708.22 - 4542.21) |                                    |       |                                              |
| - RIZIV costs (€)                 | Mean   | 3535.69 (± 2931.90)         | 3646.39 (± 4878.47)         | 110.70                             | 3.04  | <b>0.005</b>                                 |
|                                   | Median | 3535.69 (2179.40 - 3391.65) | 2304.52 (1729.86 - 2872.81) |                                    |       |                                              |
| - Patients costs (€)              | Mean   | 1435.89 (± 829.09)          | 1327.30 (± 753.94)          | -108.59                            | -8.18 | 0.38                                         |
|                                   | Median | 1435.89 (857.32 - 1750.41)  | 1270.58 (648.33 - 1738.51)  |                                    |       |                                              |

Values are means ± SD and median with inter-quartile in euros (€); costs savings are calculated in euros (€) and percentages (%).  
 RM = remote monitoring; CC = conventional care; HCS = health care system; RIZIV = national healthcare insurances
